# Supplementary material for: Hypoxia-inducible factor-1α in acute ischemic stroke: neuroprotection for better clinical outcome
Source: PubMed Central journal article supplement — Heliyon. 2020 Jun 28;6(6):e04286. doi: 10.1016/j.heliyon.2020.e04286 (PMC7327744; doi:10.1016/j.heliyon.2020.e04286), 2020-06-28
Supplement: mmc1.pdf [file mmc1.pdf]

| No Studi | Inisial | Age | M/F | No RM      | Stroke tyFe | Onset (hours) | Onset criteria | Risk factors |                |    |                |    |     |        |               |              |    | ASPECT FA | NIHSS Total |
|----------|---------|-----|-----|------------|-------------|---------------|----------------|--------------|----------------|----|----------------|----|-----|--------|---------------|--------------|----|-----------|-------------|
|          |         |     |     |            |             |               |                | HT           | DysMiF i demia | DM | Artery disease | AF | CAD | Smoker | VaMve disease | Frothro mbik |    |           |             |
| 1        | FA      | 52  | F   | 0001716189 | Lak         | 13            | Akut           | Y            | Y              | Y  | -              | -  | -   | -      | -             | -            | 8  | 6         |             |
| 2        | AR      | 68  | M   | 0001722650 | Lak         | 19            | Akut           | Y            | Y              | -  | -              | -  | -   | -      | -             | -            | 9  | 3         |             |
| 3        | ES      | 60  | M   | 0000509569 | Lak         | 4             | Hiperakut      | Y            | Y              | -  | -              | -  | -   | -      | -             | -            | 9  | 4         |             |
| 4        | EU      | 52  | F   | 0001732655 | Lak         | 6             | Hiperakut      | Y            | -              | -  | -              | -  | -   | -      | -             | -            | 9  | 8         |             |
| 5        | TI      | 51  | F   | 0001717251 | AAB         | 16            | Akut           | Y            | Y              | -  | Y              | -  | -   | -      | -             | -            | 8  | 10        |             |
| 6        | JU      | 45  | F   | 0001727636 | KE          | 7             | Akut           | Y            | Y              | Y  | -              | -  | -   | -      | Y             | -            | 9  | 6         |             |
| 7        | BA      | 45  | M   | 0001725906 | Lain        | 9             | Akut           | -            | -              | -  | -              | -  | -   | -      | -             | Y            | 8  | 10        |             |
| 8        | IK      | 69  | F   | 0001719315 | Lak         | 18            | Akut           | Y            | Y              | -  | -              | -  | -   | -      | -             | -            | 9  | 3         |             |
| 9        | EH      | 66  | M   | 0001713082 | KE          | 12            | Akut           | -            | -              | -  | -              | Y  | -   | -      | -             | -            | 5  | 18        |             |
| 10       | NR      | 65  | M   | 0001723388 | Lak         | 20            | Akut           | Y            | -              | Y  | -              | -  | -   | -      | -             | -            | 9  | 5         |             |
| 11       | AW      | 52  | F   | 0001738235 | Lak         | 24            | Akut           | Y            | -              | -  | -              | -  | -   | -      | -             | -            | 8  | 9         |             |
| 12       | FU      | 48  | F   | 0001690561 | Lak         | 5             | Hiperakut      | Y            | -              | -  | -              | -  | -   | -      | -             | -            | 10 | 1         |             |
| 13       | DH      | 61  | M   | 0000881098 | AAB         | 24            | Akut           | Y            | Y              | Y  | Y              | -  | -   | Y      | -             | -            | 8  | 6         |             |
| 14       | AS      | 37  | F   | 0001720490 | Lak         | 7             | Akut           | Y            | Y              | -  | -              | -  | -   | -      | -             | -            | 8  | 8         |             |
| 15       | EM      | 47  | M   | 0001689092 | Lak         | 17            | Akut           | Y            | Y              | -  | -              | -  | -   | -      | -             | -            | 10 | 3         |             |
| 16       | EF      | 52  | F   | 0001693353 | KE          | 5             | Hiperakut      | -            | -              | -  | -              | Y  | -   | -      | -             | -            | 6  | 18        |             |
| 17       | SU      | 56  | M   | 0001705811 | KE          | 4             | Hiperakut      | -            | -              | -  | -              | -  | Y   | -      | -             | -            | 1  | 20        |             |
| 18       | IA      | 51  | F   | 0001730156 | Lak         | 12            | Akut           | Y            | Y              | Y  | -              | -  | -   | -      | -             | -            | 8  | 13        |             |
| 19       | AF      | 62  | M   | 0001706660 | Lak         | 24            | Akut           | Y            | -              | -  | -              | -  | -   | -      | -             | -            | 9  | 4         |             |
| 20       | DA      | 45  | M   | 0001706972 | Lak         | 24            | Akut           | Y            | Y              | -  | -              | -  | -   | Y      | -             | -            | 9  | 4         |             |
| 21       | WI      | 68  | M   | 0001684430 | KE          | 4             | Hiperakut      | Y            | -              | -  | -              | -  | Y   | -      | -             | -            | 3  | 21        |             |
| 22       | DJ      | 61  | F   | 0001684337 | Lak         | 20            | Akut           | Y            | -              | -  | -              | -  | -   | -      | -             | -            | 8  | 7         |             |
| 23       | YH      | 40  | M   | 0001709606 | AAB         | 7             | Akut           | -            | -              | -  | Y              | -  | -   | Y      | -             | -            | 9  | 11        |             |
|          |         |     |     |            |             |               |                |              |                |    |                |    |     |        |               |              |    |           |             |

|    |        |    |   |            |     |    |           |   |   |   |   |   |   |   |   |   |    |    |
|----|--------|----|---|------------|-----|----|-----------|---|---|---|---|---|---|---|---|---|----|----|
| 24 | TH     | 50 | M | 0001727889 | KE  | 5  | Hiperakut | Y | - | - | - | Y | - | - | - | - | 6  | 17 |
| 25 | RA     | 68 | F | 0001736721 | KE  | 8  | Akut      | Y | - | - | - | Y | - | - | - | - | 9  | 14 |
| 26 | KA     | 74 | F | 0001687633 | AAB | 24 | Akut      | Y | Y | - | Y | - | - | - | - | - | 6  | 16 |
| 27 | AM     | 66 | F | 0001732409 | KE  | 6  | Hiperakut | Y | Y | - | - | - | Y | - | - | - | 7  | 15 |
| 29 | TA     | 53 | M | 0001716996 | Lak | 24 | Akut      | Y | - | - | - | - | - | Y | - | - | 8  | 10 |
| 30 | RO     | 51 | F | 0000461218 | Lak | 5  | Hiperakut | Y | Y | - | - | - | - | Y | - | - | 9  | 4  |
| 31 | UH     | 66 | M | 0001707385 | AAB | 18 | Akut      | Y | Y | Y | Y | - | - | - | - | - | 8  | 6  |
| 32 | AF     | 54 | M | 0001599850 | Lak | 12 | Akut      | - | - | Y | - | - | - | - | - | - | 9  | 7  |
| 33 | MI     | 65 | F | 0001706401 | AAB | 10 | Akut      | Y | Y | - | Y | - | - | - | - | - | 8  | 15 |
| 34 | IS     | 64 | M | 0001706892 | AAB | 24 | Akut      | Y | - | Y | - | - | - | Y | - | - | 8  | 7  |
| 35 | ED     | 45 | F | 0001706351 | AAB | 6  | Hiperakut | Y | - | - | Y | - | - | - | - | - | 8  | 12 |
| 36 | EB     | 60 | F | 0001704141 | Lak | 8  | Akut      | Y | Y | - | - | - | - | - | - | - | 9  | 9  |
| 37 | UG     | 71 | F | 0001708994 | KE  | 20 | Akut      | - | - | - | - | Y | - | - | - | - | 7  | 19 |
| 38 | TN     | 57 | F | 0001705598 | AAB | 24 | Akut      | Y | Y | Y | Y | - | - | - | - | - | 7  | 15 |
| 39 | FO     | 46 | F | 0001711968 | Lak | 24 | Akut      | - | - | - | - | - | Y | - | - | - | 6  | 18 |
| 40 | JA     | 56 | F | 0001692564 | KE  | 20 | Akut      | - | - | - | - | Y | Y | - | - | - | 5  | 22 |
| 41 | M<br>M | 48 | F | 0001712587 | Lak | 10 | Akut      | Y | Y | - | - | - | - | - | - | - | 8  | 10 |
| 43 | AJ     | 71 | M | 0001722265 | KE  | 17 | Akut      | - | - | - | - | Y | - | - | - | - | 8  | 6  |
| 44 | EN     | 84 | F | 0001705696 | KE  | 10 | Akut      | - | - | - | - | Y | - | - | - | - | 5  | 20 |
| 45 | BF     | 46 | M | 0000708033 | Lak | 18 | Akut      | Y | Y | - | - | - | - | - | - | - | 10 | 5  |
| 46 | EA     | 45 | F | 0001703095 | AAB | 14 | Akut      | Y | Y | - | Y | - | - | - | - | - | 9  | 8  |
| 47 | NI     | 75 | F | 0001701125 | KE  | 10 | Akut      | Y | - | Y | - | - | Y | - | - | - | 0  | 23 |
| 48 | AT     | 65 | F | 0001694120 | Lak | 8  | Akut      | Y | Y | Y | - | - | - | - | - | - | 7  | 6  |
